# Supplementary material for: Epigenetic Predictor of Age
Source: PLoS One. 2011 Jun 22;6(6):e14821. doi: 10.1371/journal.pone.0014821 (PMC3120753; doi:10.1371/journal.pone.0014821)
Supplement: Table S1 — 88 loci significantly correlated with age TargetID represents the exact Illumina probe on the array, Chr: chromosome number, Gene_ID: NCBI Gene database locator, Symbol: gene name, r: correlation coefficient, p-value: significance of correlation, q-value: significance corrected for multiple comparisons. (0.04 MB XLS) [file pone.0014821.s002.xls]

## Sheet: Sheet1
TargetID	Chr	Gene_ID	Symbol	r	p-value	q-value
cg27553955	2	170850	KCNG3	0.807	8.38e-09	0.00012
cg12799895	7	4885	NPTX2	0.754	2.59e-07	0.00124
cg21296230	15	26585	GREM1	0.758	2.14e-07	0.00124
cg04084157	7	7425	VGF	0.726	1.2e-06	0.00188
cg25148589	4	2891	GRIA2	0.723	1.37e-06	0.00188
cg17861230	19	5143	PDE4C	0.734	8e-07	0.00188
cg03734874	14	388021	FLJ42486	0.728	1.07e-06	0.00188
cg18236477	13	51761	ATP8A2	0.722	1.45e-06	0.00188
cg27320127	2	56660	KCNK12	0.722	1.44e-06	0.00188
cg07621046	10	143379	C10orf82	0.724	1.3e-06	0.00188
cg14456683	3	7545	ZIC1	0.709	2.71e-06	0.00277
cg21801378	15	60677	BRUNOL6	0.703	3.51e-06	0.00291
cg00107187	14	388021	FLJ42486	0.702	3.65e-06	0.00291
cg05508084	19	63934	ZNF667	0.704	3.37e-06	0.00291
cg07533148	1	25893	TRIM58	0.701	3.89e-06	0.00291
cg03975694	19	163255	ZNF540	0.7	4.06e-06	0.00291
cg19945840	1	126792	B3GALT6	0.699	4.3e-06	0.00293
cg00399483	18	1630	DCC	0.697	4.62e-06	0.00301
cg06291867	10	3363	HTR7	0.687	7.32e-06	0.00438
cg24826867	16	3394	IRF8	0.681	9.24e-06	0.00474
cg06092815	2	80309	SKIP	0.679	1.02e-05	0.00503
cg19885761	5	10814	CPLX2	0.677	1.1e-05	0.00526
cg24199834	4	5458	POU4F2	0.675	1.21e-05	0.00561
cg04528819	7	136259	KLF14	0.673	1.29e-05	0.00578
cg13434842	8	2626	GATA4	0.667	1.64e-05	0.00711
cg02008154	7	57057	TBX20	0.664	1.86e-05	0.00786
cg25044651	5	206338	FLJ90650	0.661	2.05e-05	0.00803
cg02994956	22	4744	NEFH	0.661	2.07e-05	0.00803
cg20366906	13	5100	PCDH8	0.656	2.5e-05	0.00944
cg27389185	19	163255	ZNF540	0.654	2.73e-05	0.01003
cg14826456	10	153	ADRB1	0.653	2.88e-05	0.01032
cg12111714	13	51761	ATP8A2	0.651	3.03e-05	0.01061
cg12457773	6	140767	VMP	0.649	3.36e-05	0.01147
cg11981599	8	2626	GATA4	0.646	3.67e-05	0.01166
cg00059225	5	2741	GLRA1	0.646	3.63e-05	0.01166
cg06572160	19	3748	KCNC3	0.642	4.21e-05	0.01262
cg08668790	19	7710	ZNF154	0.642	4.22e-05	0.01262
cg12782180	7	3952	LEP	0.641	4.43e-05	0.01296
cg20134215	6	84539	MCHR2	0.633	5.84e-05	0.01505
cg13921352	3	151647	FAM19A4	0.631	6.37e-05	0.01575
cg13614181	13	28984	RGC32	0.628	6.89e-05	0.01648
cg23563234	5	56099	PCDHGB7	0.628	7.06e-05	0.01661
cg00201234	3	2199	FBLN2	0.626	7.57e-05	0.01696
cg21992250	11	51296	SLC15A3	0.626	7.56e-05	0.01696
cg00911351	5	8641	PCDHGB4	0.625	7.73e-05	0.01705
cg19594666	7	3952	LEP	0.624	7.91e-05	0.0172
cg15425280	4	2891	GRIA2	0.619	9.39e-05	0.01898
cg06156376	3	6474	SHOX2	0.619	9.37e-05	0.01898
cg19831077	7	349136	LOC349136	0.618	9.77e-05	0.01946
cg27409364	11	3746	KCNC1	0.613	0.00011468	0.02137
cg15747595	8	85453	TSPYL5	0.612	0.000121753	0.02211
cg02154186	8	10687	PNMA2	0.608	0.000135948	0.02408
cg20616414	9	65268	WNK2	0.605	0.000148266	0.02502
cg10235817	4	152	ADRA2C	0.605	0.000151453	0.02526
cg16232126	2	60482	SLC5A7	0.602	0.00016384	0.02671
cg24646414	8	2626	GATA4	0.603	0.000162296	0.02671
cg17241310	1	343472	BARHL2	0.6	0.00017402	0.0275
cg10031651	3	79442	LRRC2	0.596	0.000199077	0.03104
cg23290344	8	4741	NEF3	0.595	0.000207878	0.03207
cg06908778	10	9576	SPAG6	0.591	0.000230493	0.03283
cg02844545	6	9247	GCM2	0.594	0.000215307	0.03283
cg14614211	10	283078	IRXL1	0.592	0.000224639	0.03283
cg25511429	6	51299	NRN1	0.589	0.000244086	0.03367
cg15201635	16	55512	SMPD3	0.59	0.000243284	0.03367
cg19246110	19	79891	ZNF671	0.589	0.000251007	0.03397
cg06760035	17	3214	HOXB4	0.587	0.000263627	0.03534
cg13603171	6	26002	MOXD1	0.583	0.000295067	0.03883
cg13282837	14	8115	TCL1A	0.579	0.00033117	0.0428
cg20792062	12	3741	KCNA5	0.571	0.000421691	0.04999
cg02228185	17	443	ASPA	-0.731	9.14e-07	0.00188
cg13547237	11	83638	Bles03	-0.717	1.84e-06	0.00218
cg09809672	1	128178	EDARADD	-0.715	1.98e-06	0.00218
cg01293143	20	6919	TCEA2	-0.703	3.61e-06	0.00291
cg05822532	7	2006	ELN	-0.688	7e-06	0.00437
cg07408456	19	114770	PGLYRP2	-0.685	7.9e-06	0.00453
cg08468689	17	84514	LGP1	-0.682	8.74e-06	0.00464
cg27210390	17	10040	TOM1L1	-0.683	8.53e-06	0.00464
cg01820374	12	3902	LAG3	-0.663	1.93e-05	0.0079
cg17589341	18	6563	SLC14A1	-0.64	4.63e-05	0.01302
cg19761273	17	1453	CSNK1D	-0.634	5.62e-05	0.01493
cg03440846	20	55902	ACSS2	-0.611	0.00012427	0.02228
cg08909157	9	157983	C9orf66	-0.607	0.00013896	0.02431
cg11136562	5	64411	CENTD3	-0.592	0.000227926	0.03283
cg16464322	19	3191	HNRPL	-0.592	0.000227715	0.03283
cg08872742	16	1003	CDH5	-0.582	0.00030785	0.04015
cg18328933	3	25864	ABHD14A	-0.579	0.000338098	0.0433
cg15784615	12	4055	LTBR	-0.577	0.000350304	0.04374
cg23282949	X	5973	RENBP	-0.577	0.000358602	0.04435
