# Supplementary material for: Epigenetic Predictor of Age
Source: PLoS One. 2011 Jun 22;6(6):e14821. doi: 10.1371/journal.pone.0014821 (PMC3120753; doi:10.1371/journal.pone.0014821)
Supplement: Table S3 — Disease and molecular function categories significantly enriched in ingenuity analysis. (0.03 MB XLS) [file pone.0014821.s004.xls]

## Sheet: Sheet1
Category	Significance	List of genes in each category
Cardiovascular disease	p=1.59x10-6	ADRA2C, ADRB1, ATP8A2, DCC, ELN, FAM19A4, GATA4, GRIA2, HTR7, IRF8, KCNA5, KCNC1, LEP, MOXD1, NRSN1, PDE4C, TBX20
Genetic disease	p=1.59x10-6	ADRA2C, ADRB1, ASPA, ATP8A2, CPLX2, EDARADD, ELN, GATA4, GCM2, GRIA2, HTR7, KCNA5, LEP, NEFH, NEFM, PCDH8, PDE4C, SLC14A1, SLC5A7, TBX20
Neurological disease	p=1.47x10-4	ADRA2C, ADRB1, ASPA, ATP8A2, CPLX2, GRIA2, HTR7, LEP, NEFH, NEFM, PCDH8, PDE4C, SLC14A1, SLC5A7
Molecular transport	p=2.4x10-3	ADRB1, CPLX2, GLRA1, HTR7, KCNA5, KCNC1, KCNC3, LEP, SLC14A1, SLC5A7
